# Supplementary material
Source: publisher figshare collection journal article supplement (https://sage.figshare.com/ndownloader/files/24127807)
Supplement: Supplementary file 1 [file 24127807]

Table S1 The causes of technique failure

|  | CAPD (N = 266) | APD ( N =90) |
| --- | --- | --- |
| Death | 112 (42.1%) | 27 (30.0%) |
| Peritonitis | 61 (22.9%) | 29 (32.2%) |
| Burnout | 55 (20.7%) | 12 (13.3%) |
| Medical problems | 17 (6.4%) | 12 (13.3%) |
| Inadequate dialysis | 14 (5.3%) | 6 (6.7%) |
| Mechanical problems | 4 (1.5%) | 2 (2.2%) |
| Tunnel infection | 3 (1.1%) | 1 (1.1%) |
| Encapsulating peritoneal sclerosis | 0 (0.0%) | 1 (1.1%) |

Abbreviations: CAPD, continuous ambulatory peritoneal dialysis; APD, automated peritoneal dialysis
